# Supplementary material for: Vitamin A- and D-Deficient Diets Disrupt Intestinal Antimicrobial Peptide Defense Involving Wnt and STAT5 Signaling Pathways in Mice
Source: MDPI journal article supplement (doi:10.3390/nu15020376), 2023-01-11
Supplement: s1 [file s1]

## Supplements

Table S1. Primers used in quantitative real-time PCR.

| Primer       | Forward (5'-3')             | Reverse (5'-3')            |
|--------------|-----------------------------|----------------------------|
| Actb         | GCTGAGAGGGAAATCGTGCGTG      | CCAGGGAGGAAGAGGATGCGG      |
| Pan-cryptdin | AAGAGACTAAAACTGAGGAGCAGC    | GGTGATCATCAGACCCCAGCATCAGT |
| Defa1        | TCAAGAGGCTGCAAAGGAAGAGAAC   | TGGTCTCCATGTTTACGCGACAGC   |
| Defa21       | CCAGGGGAAGATGACCAGGCT       | TGCAGCGACGATTTCTACAAAGGC   |
| PPARG        | TTGCTGAACGTGAAGCCCATCGAGG   | GACGAGGTCCTCTAGATGTTTCTG   |
| Lyz1         | GCCAAGGTCTACAATCGTTGTGAGTTG | CAGTCAGCCAGCTTGACACCACG    |
| Reg3g        | TTCCTGTCCTCCATGATCAAAA      | CATCCACCTCTGTTGGGTTC       |
| Defb1        | TCCAATAACATGCATGACCA        | TCATGGAGGAGCAAATTCTG       |
| Defb2        | TCAGAGCCATTTGTCCTCCT        | TGACTTCCATGTGCTTCCTTC      |
| Defb4        | TCCAATAACATGCATGACCA        | TCATGGAGGAGCAAATTCTG       |
| Defa5        | TCAAAAAGCTGATATGCTATTG      | AGCTGCAGCAGAATACGAAAG      |
| Mmp7         | TTCAAGAGGGTTAGTTGGGGGACTG   | CCGCCTCTACGAGTGAAACTGTT    |
| Myd88        | CAAAAGTGGGGTGCCTTTGC        | AAATCCACAGTGCCCCCAGA       |
| Tnfa         | ACCACCATCAAGGACTCA          | AGGTCTGAAGGTAGGAAG         |
| NOD2         | GGCACCTGAAGTTGACATTTTGC     | ATCTCCCACAGAGTTGTAATCC     |
| IL6          | AGTCACAGAAGGAGTGGCTA        | CTGACCACAGTGAGGAATGT       |
| IL1 $\beta$  | ACGGATTCCATGGTGAAGTC        | GAGTGTGGATCCCAAGCAAT       |
| BiP          | TCATCGGACGCACTTGGA          | TGGTTTGCCACCTCCAATA        |
| ATF4         | GGAAGACACTCCCTCTGACAATG     | ACGGAACCACTGGAGAAG         |
| Muc2         | GATGGCACCTACCTCGTTGT        | GTCCTGGCACTTGTGGAAT        |
| Wnt3         | TGGAAGTGTACCACCATAGATGAC    | GTAGCGGAGCCGACCACA         |
| Wnt5a        | ATGGTGTGTCTGGCTCCTG         | CAGTGGCTTCATTGGTAGTGCT     |
| Wnt9a        | GCAGGACTTTCTCAAGGACA        | CCCTGCCAAAGACAGAAGTA       |
| LRP6         | TGGTGGCTTGTGGTGCTG          | CAATGGCGATGCGAACTG         |
| Tcf1         | CCAGGACTCACCTCGTA           | TTCTGTGCCTAGCAACCAA        |
| Tcf4         | CTGGTCTGCACGGGATAA          | TGTGACTTGGCGTCTTGG         |

Abbreviations: Actb,  $\beta$ -Actin; pan-cryptdin, pancryptdin; Defa1, cryptdin-1; Defa5,  $\alpha$ -defensin 5; Defa21, cryptdin-4; PPARG, peroxisome proliferator activated receptor gamma; Lyz1, lysozyme; Reg3g, regenerating islet-derived protein 3 gamma; Defb, murine  $\beta$ -defensin; Mmp7, matrix metalloproteinase-7; Myd88, myeloid differentiation primary response 88; Tnfa, tumor necrose factor a; NOD2, nucleotide-binding oligomerization domain-containing protein 2; IL, interleukin; BiP, chaperone protein-binding protein; ATF4, activating transcription factor 4; Muc, Mucin; Wnt, wntless and Int; LRP6, low-density-lipoprotein receptor related protein 6; Tcf, T cell-specific transcription factor.

Figure S1:

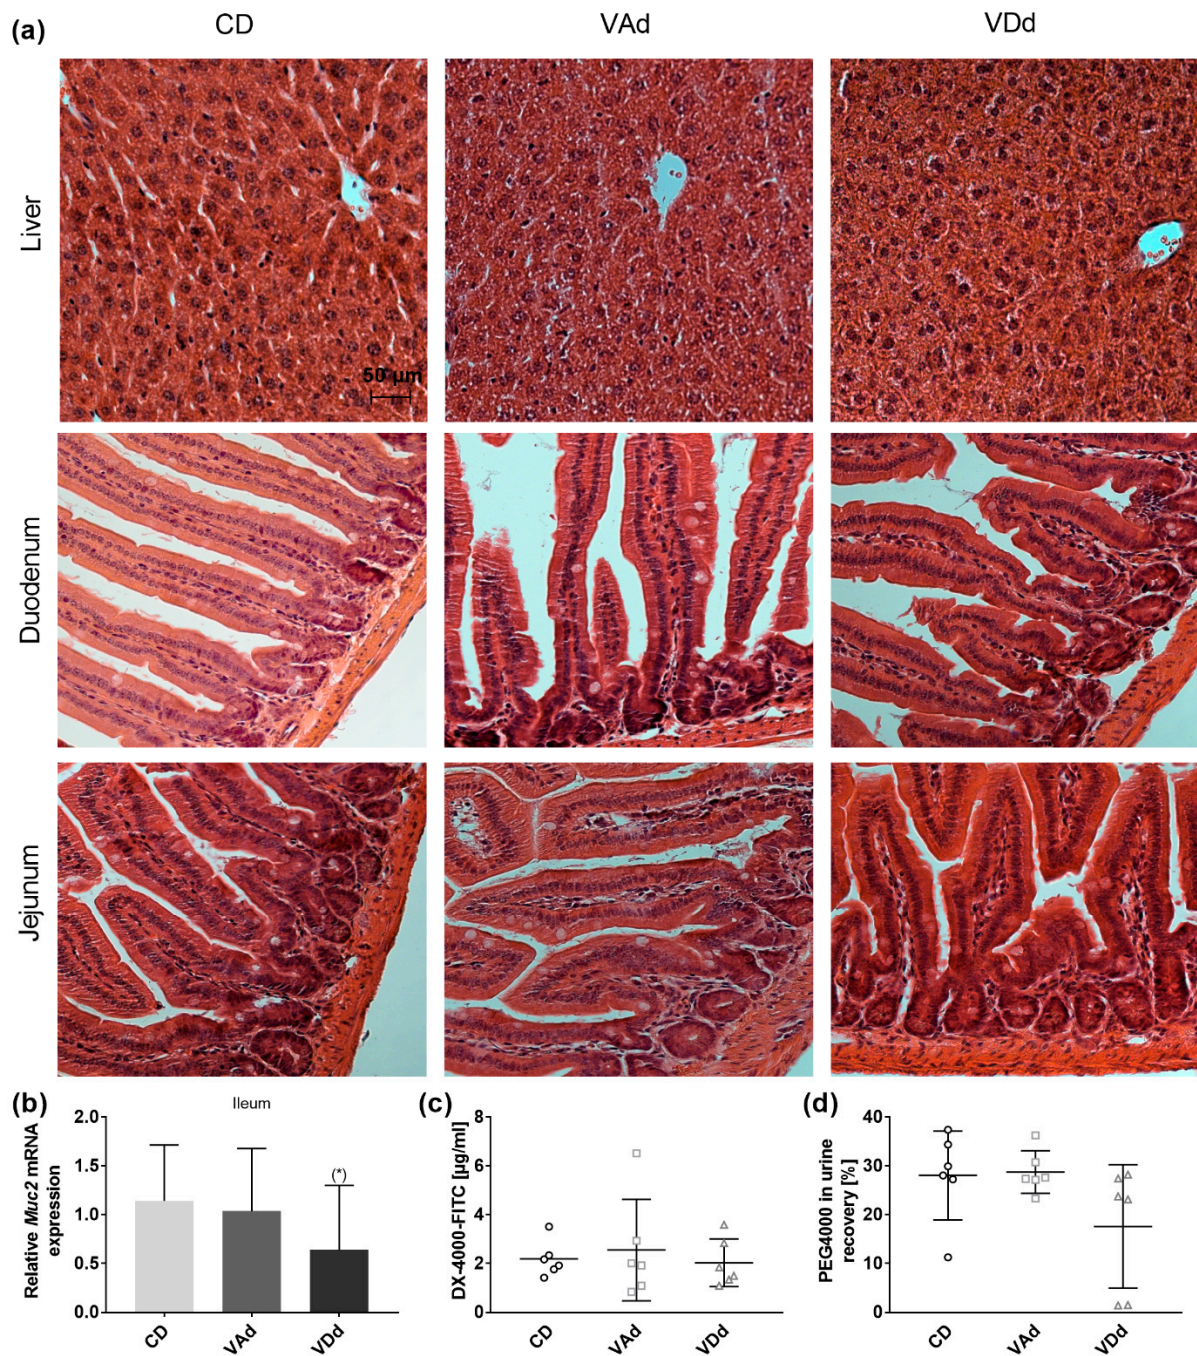

Figure S1. Representative images of HE staining in hepatic, duodenal and jejunal tissue. Scale bar: 50 μm (a). Relative mRNA expression of Muc 2 in the ileum quantified by RT-PCR (b). Intestinal permeability was determined by Dx-4000-FITC in the portal venous plasma (c) and by PEG4000 recovery in the urine (d) Data are presented as means  $\pm$  standard error of the mean (SEM) (n = 8-12). Statistical analysis was performed by one-way ANOVA with Sidak's post-test. Abbreviations: CD, control diet; VAd, vitamin A free diet; VDd, vitamin D free diet, DX-4000-FITC, fluorescein isothiocyanate-dextran; Muc2, mucin 2; PEG, polyethylene glycol.

Figure S2:

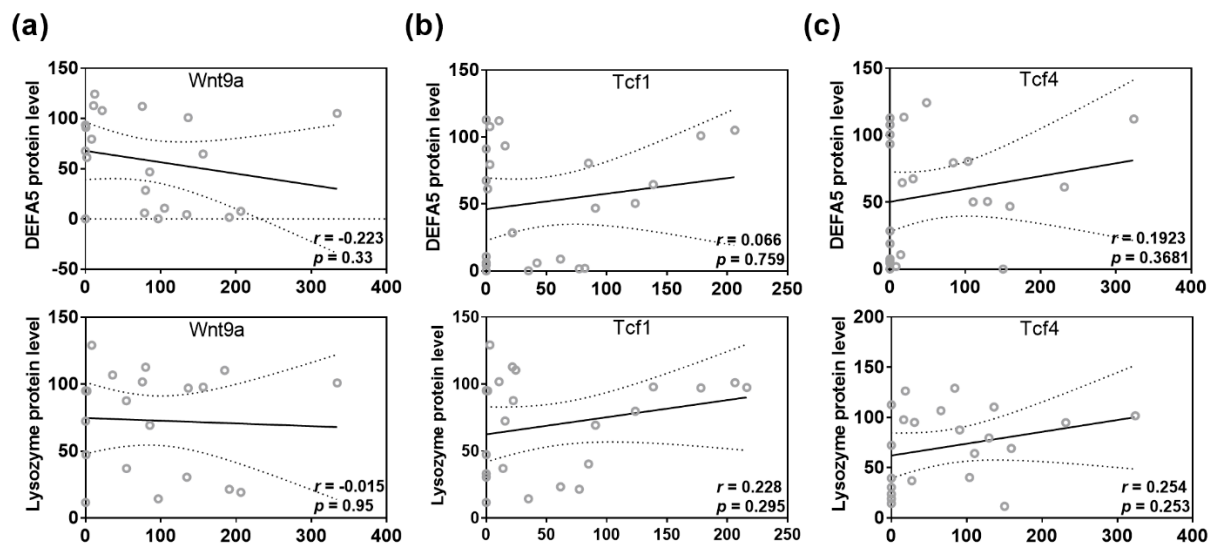

Figure S2. Correlation analysis for DEFA5 or lysozyme protein level and Wnt9a (a), Tcf1 (b), and Tcf4 (c) expression. Statistical analysis was performed by two-tailed Spearman-rank correlation analysis. Correlations in the range of 0.3 to 0.6 or -0.3 to -0.6 were defined as positive or negative correlations. For abbreviations, see Figure 2, and 3.
